# Supplementary material for: Crystalline salts of a diuretic drug torasemide with improved solubility and dissolution properties
Source: Royal Society of Chemistry journal article supplement (doi:10.1039/d2ce00383j), 2022-01-01
Supplement: d2ce00383j1.pdf [file d2ce00383j1.pdf]

### **Electronic Supplementary Information (ESI)**

#### **Crystalline salts of a diuretic drug Torasemide with improved solubility and dissolution properties.**

Monika Garg,<sup>a</sup> Mayank K. Singh,<sup>b</sup> Saylee Manohar Koli,<sup>a</sup> Bojja Sreedhar<sup>c,d</sup> Sistla Ramakrishna,<sup>\*b,d</sup> Jagadeesh Babu Nanubolu<sup>\*a,d</sup>

<sup>a</sup>Centre for X-ray Crystallography, Department of Analytical & Structural Chemistry, CSIR-Indian Institute of Chemical Technology, Tarnaka, Uppal Road, Hyderabad-500007, Telangana, India.

<sup>b</sup>Department of Applied Biology, CSIR-Indian Institute of Chemical Technology, Tarnaka, Uppal Road, Hyderabad-500007, Telangana, India.

<sup>c</sup>Department of Analytical & Structural Chemistry, CSIR-Indian Institute of Chemical Technology, Tarnaka, Uppal Road, Hyderabad-500007, Telangana, India.

<sup>d</sup>Academy of Scientific and Innovative Research (AcSIR), New Delhi, 110025, India

#### **Table of Contents of ESI**

| <b>Description</b>                                                                               | <b>Figure/Table No</b> | <b>Page No</b> |
|--------------------------------------------------------------------------------------------------|------------------------|----------------|
| Neutral/Zwitterionic/Ionic states in crystal structures                                          | Table S1               | 2              |
| Predicting the salt formation based on pKa values of the torasemide drug and coformer molecules. | Table S2               | 2              |
| Void maps in T-II form of torasemide                                                             | Figure S1              | 3              |
| Experimental PXRD and comparison with simulated XRD patterns                                     | Figures S2-S6          | 4-8            |
| FT-IR spectra of polymorphs and salts                                                            | Figures S7-11          | 9-11           |
| DSC scans of polymorphs and salts                                                                | Figure S12-S16         | 11-13          |
| TGA plot of TRS-FUM                                                                              | Figure S17             | 14             |
| Slurry experiments in water                                                                      | Figure S18-S12         | 14-16          |

**Table S1.** Crystal structures, canonical states and intramolecular hydrogen bonds

| S.No | CSD Refcodes                                 | Label                                     | Conformations | Neutral/ionic                | Intramolecular H- Bond, represented by graph-set notation              |
|------|----------------------------------------------|-------------------------------------------|---------------|------------------------------|------------------------------------------------------------------------|
| 1    | TORSEM<br>TORSEM02<br>TORSEM05               | Polymorph<br>T-I                          | 2             | Neutral<br>Zwitterionic      | S8 motif, N-H...O=C<br>S6 motif, N-H...O=S                             |
| 2    | TORSEM01                                     | T-II<br>It is a solvate                   | 2             | Zwitterionic<br>Zwitterionic | S6 motif, N-H...N <sup>-</sup> -S<br>S6 motif, N-H...N <sup>-</sup> -S |
| 3    | TORSEM03<br>TORSEM04<br>TORSEM06<br>TORSEM07 | Polymorph<br>T-N/T-III                    | 2             | Zwitterionic<br>Zwitterionic | S6 motif, N-H...N <sup>-</sup> -S<br>S6 motif, N-H...N <sup>-</sup> -S |
| 4    | QOVDUB                                       | Torasemide<br>methanol<br>solvate hydrate | 2             | Zwitterionic<br>Zwitterionic | S6 motif, N-H...N <sup>-</sup> -S<br>S6 motif, N-H...N <sup>-</sup> -S |
| 5    | UKIFIE                                       | Torasemide<br>hydrochloride               | 3             | Ionic<br>Ionic<br>Ionic      | S6 motif, N-H...O=S<br>S8 motif, N-H...O=C<br>S8 motif, N-H...O=C      |

**Table S2.**  $\Delta pK_a$  values of between the drug torasemide and coformer molecules.

| S.No | Compound                        | $pK_{a1}$ | $\Delta pK_a^s$ | Is $\Delta pK_a > 3$ |
|------|---------------------------------|-----------|-----------------|----------------------|
| 1    | Oxalic acid                     | 1.23      | 5.87            | Yes                  |
| 2    | Succinic acid                   | 4.2       | 2.90            | No; very close to 3  |
| 3    | Fumaric acid                    | 3.03      | 4.07            | Yes                  |
| 4    | Tartaric acid                   | 2.98      | 4.12            | Yes                  |
| 5    | Citric acid                     | 3.14      | 3.96            | Yes                  |
| 6    | Salicylic acid                  | 2.97      | 4.13            | Yes                  |
| 7    | Benzoic acid                    | 3.20      | 3.90            | Yes                  |
| 8    | <i>p</i> -Toluene sulfonic acid | -2.1      | 9.20            | Yes                  |

\* $pK_a$  of torasemide is 7.1

$^s\Delta pK_a = pK_a$  of torasemide -  $pK_a$  of coformer (7.1 -  $pK_a$  of coformer)

**Table S3.** Dissolution studies of torasemide polymorph T-I, polymorph T-III/T-N and torasemide fumarate (TRS-FUM) and torasemide oxalate (TRS-OX) salts in simulated gastric fluid 0.1 N HCl solution (pH 1.2). The % of drug dissolved as a function of time is given below.

| Time (min) | T-I (%) | T-III/T-N (%) | TRS-FUM-1:1 (%) | TRS-OX-2:1 (%) |
|------------|---------|---------------|-----------------|----------------|
| 0          | 0       | 0             | 0               | 0              |
| 1          | 31.13   | 42.72         | 57.50           | 50.48          |
| 2.5        | 37.70   | 51.61         | 71.18           | 67.69          |
| 5          | 47.40   | 62.45         | 83.73           | 76.11          |
| 7.5        | 50.75   | 63.26         | 88.85           | 81.08          |
| 10         | 54.88   | 66.89         | 90.67           | 86.62          |
| 12.5       | 57.30   | 70.22         | 93.49           | 90.54          |
| 15         | 57.21   | 74.21         | 93.84           | 91.80          |
| 20         | 58.59   | 75.18         | 94.00           | 93.40          |
| 25         | 58.48   | 75.14         | 94.96           | 93.47          |
| 30         | 58.17   | 74.94         | 96.34           | 93.81          |
| 45         | 58.88   | 75.20         | 96.78           | 93.07          |
| 60         | 58.07   | 75.98         | 96.62           | 94.11          |

**Table S4.** Dissolution studies of torasemide polymorph T-I, polymorph T-III/T-N and torasemide fumarate (TRS-FUM) and torasemide oxalate (TRS-OX) salts in phosphate buffer (pH 6.8). The % of drug dissolved as a function of time is given below.

| Time (min) | T-I (%) | T-III/T-N (%) | TRS-FUM-1:1 (%) | TRS-OX-2:1 (%) |
|------------|---------|---------------|-----------------|----------------|
| 0          | 0       | 0             | 0               | 0              |
| 1          | 33.35   | 45.55         | 55.15           | 50.16          |
| 2.5        | 46.70   | 55.89         | 62.45           | 55.07          |
| 5          | 53.57   | 69.06         | 70.88           | 60.73          |
| 7.5        | 64.25   | 82.11         | 77.70           | 68.83          |
| 10         | 65.22   | 85.71         | 85.47           | 75.99          |
| 12.5       | 66.91   | 85.58         | 90.01           | 90.99          |
| 15         | 66.65   | 85.69         | 93.10           | 91.10          |
| 20         | 66.92   | 85.62         | 93.45           | 91.81          |
| 25         | 66.98   | 85.22         | 93.13           | 91.25          |
| 30         | 66.75   | 85.00         | 93.98           | 91.37          |
| 45         | 66.77   | 85.51         | 93.96           | 91.77          |
| 60         | 66.55   | 85.96         | 93.31           | 91.89          |

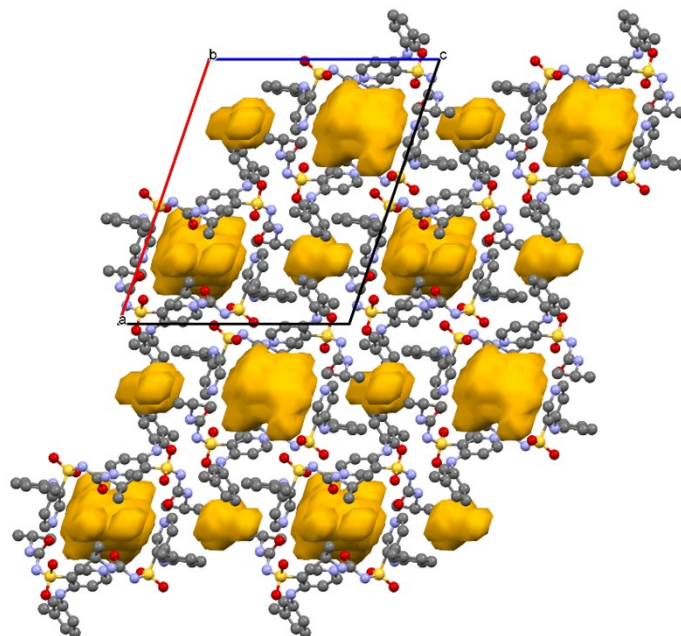

(a)

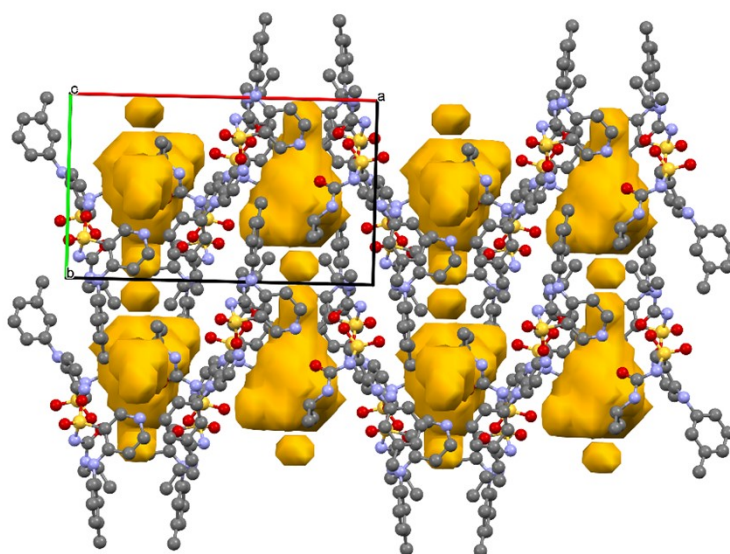

(b)

**Figure S1.** Crystal packing diagram of torasemide Form II (CSD refcode TORSEM01) showing inherent voids (empty spaces) in the crystal lattice, viewed along the (a) *b*-axis (b) *c*-axis. The void volume is  $320.6\text{\AA}^3$  which constitutes to 8.5% of the unit cell volume ( $V = 3791.87\text{\AA}^3$ ). Images were generated using “Voids” software module of CCDC Mercury 4.3.1 (Build 273970)) using the default parameters of  $1.2\text{\AA}$  probe radius and  $0.7\text{\AA}$  grid spacing.

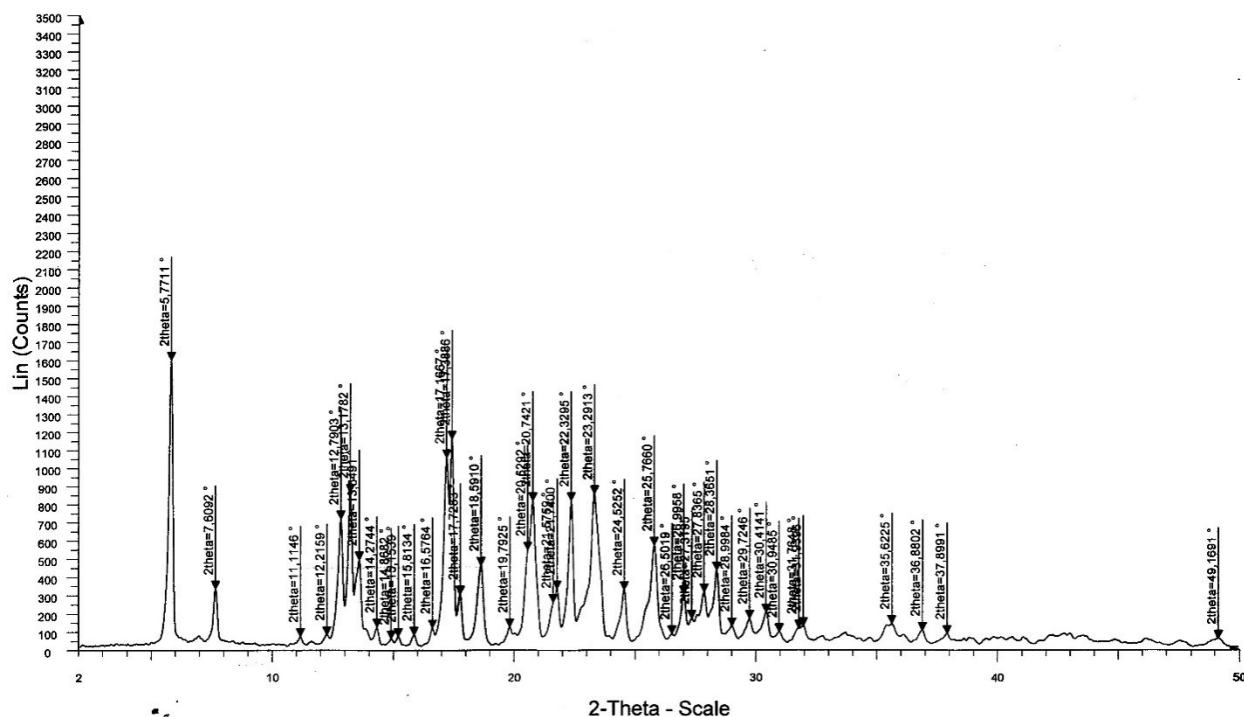

(a)

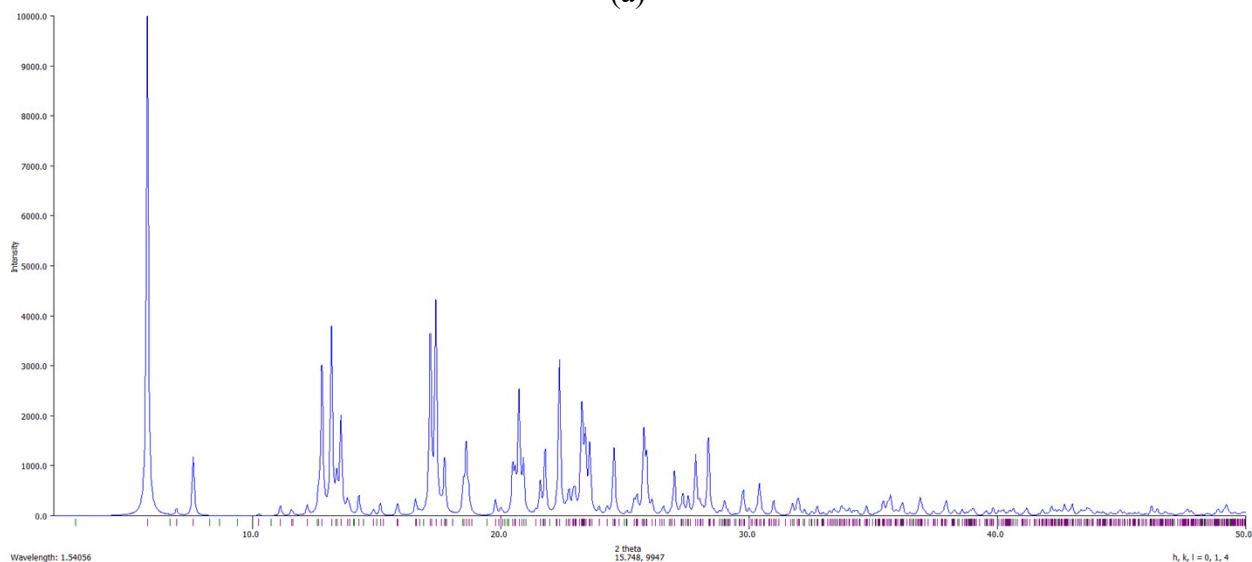

(b)

**Figure S2.** (a) Experimental PXRD pattern of form I of torasemide (b) Simulated PXRD pattern of form I of torasemide generated from CSD Refcode TORSEM (image generated in CCDC Mercury 4.3.1 (Build 273970))

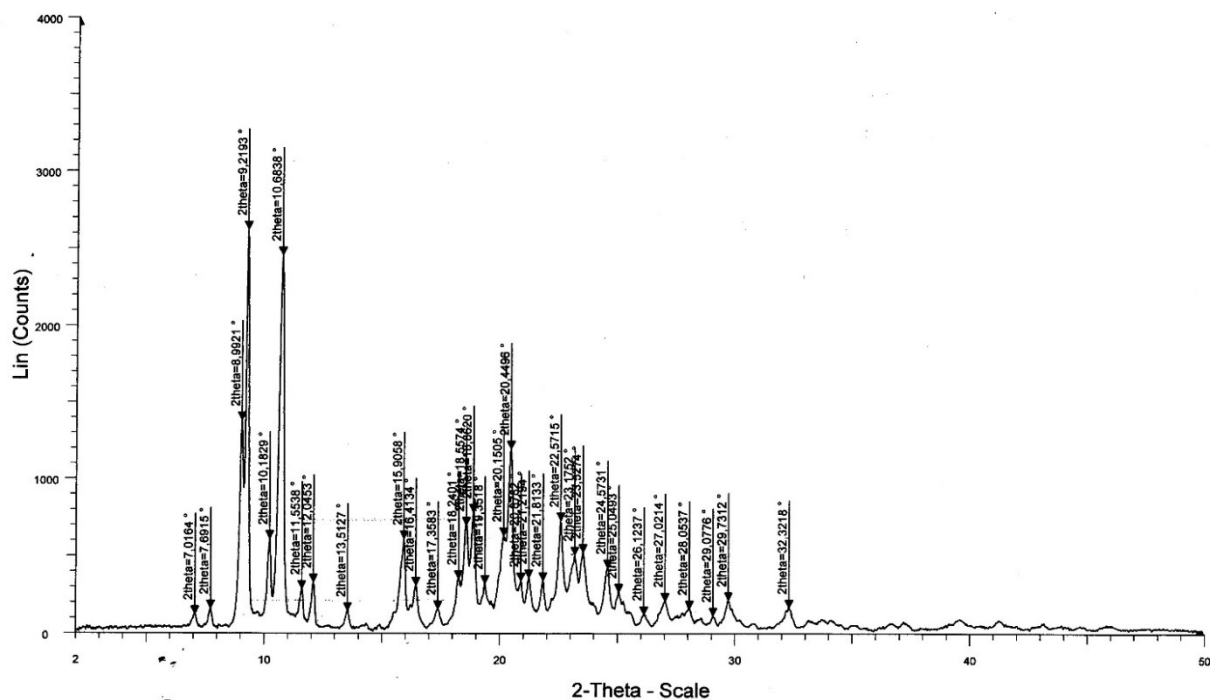

(a)

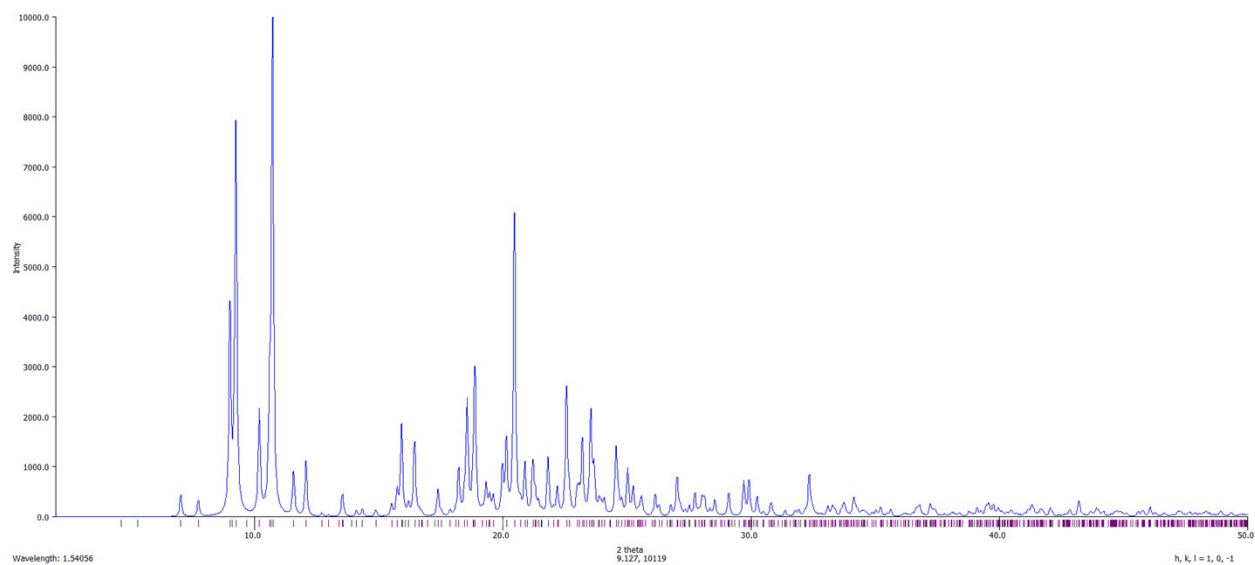

(b)

**Figure S3.** (a) Experimental PXRD pattern of T-III/T-N polymorph of torasemide. (b) Simulated PXRD pattern of T-III/T-N polymorph of torasemide generated from CSD Refcode TORSEM03 (image generated in CCDC Mercury 4.3.1 (Build 273970))

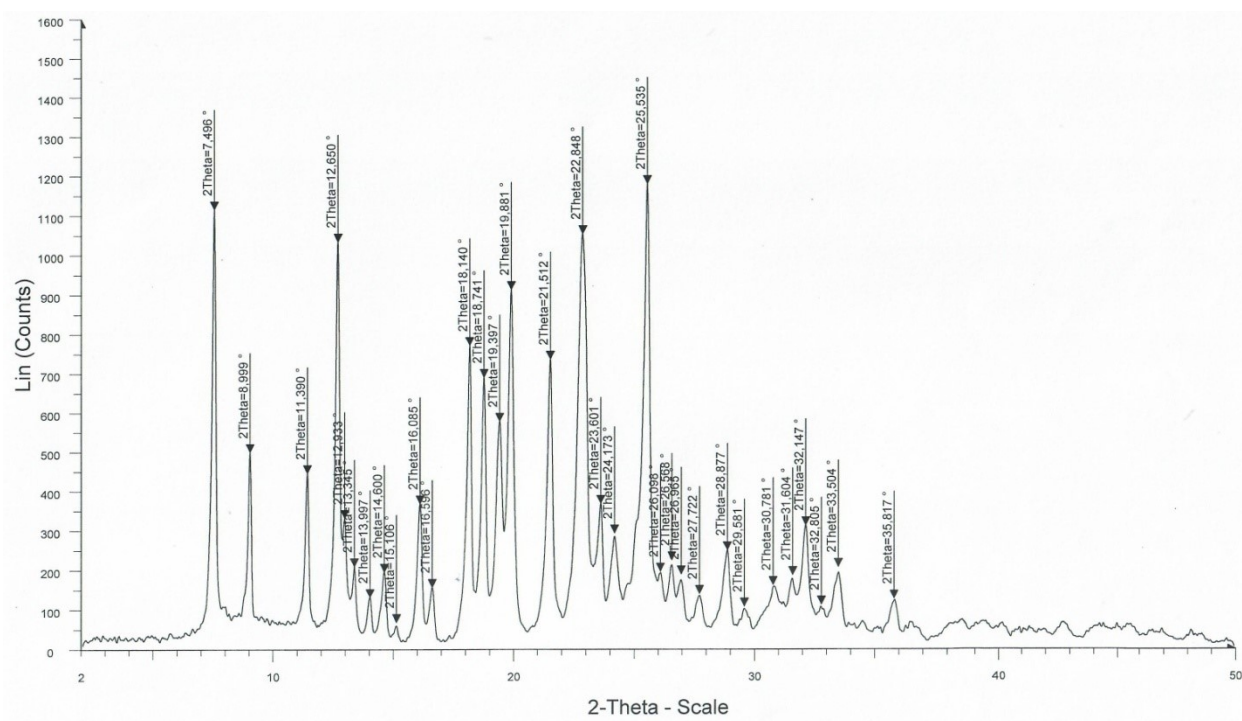

(a)

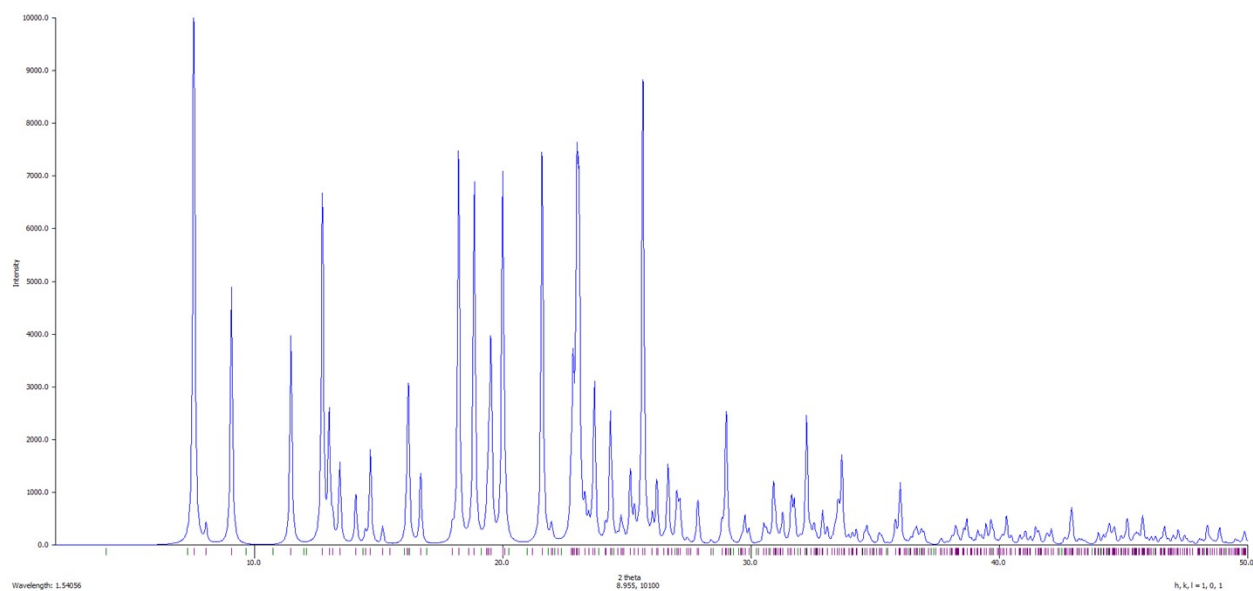

(b)

**Figure S4.** (a) Experimental PXRD pattern of TRS-FUM (1:1). (b) Simulated PXRD pattern of TRS FUM (1:1) generated from the crystal structure (image generated in CCDC Mercury 4.3.1 (Build 273970))

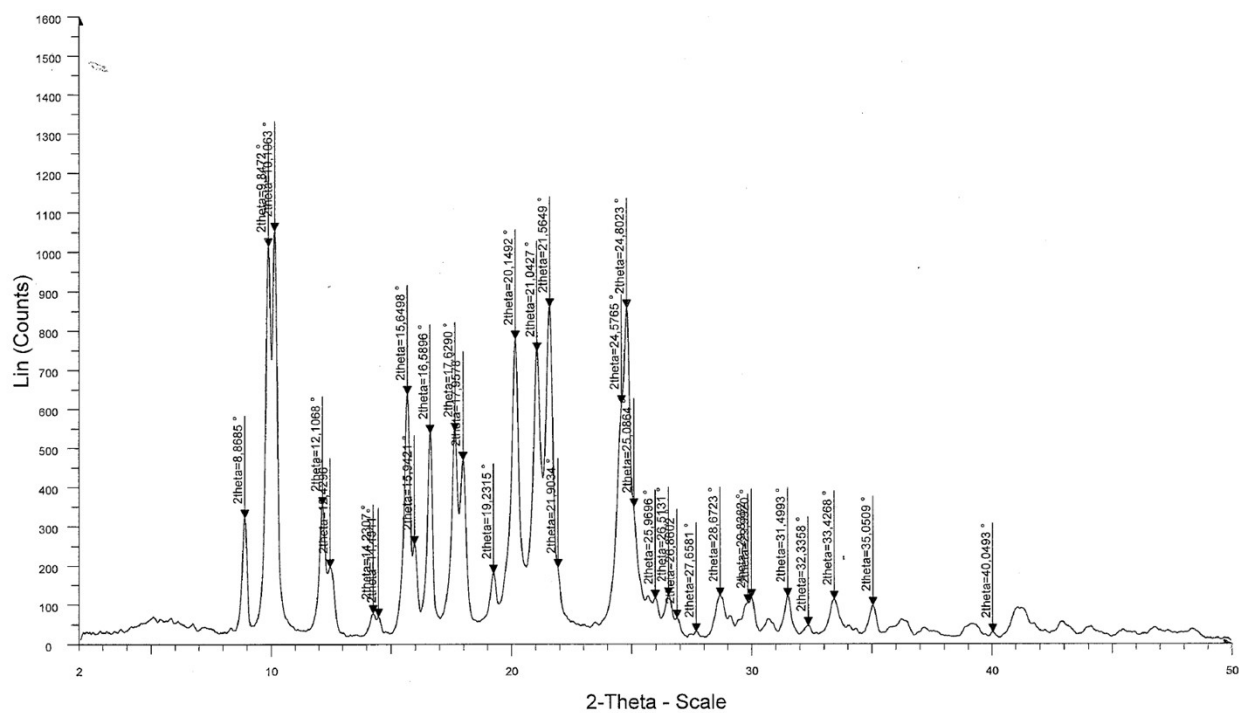

(a)

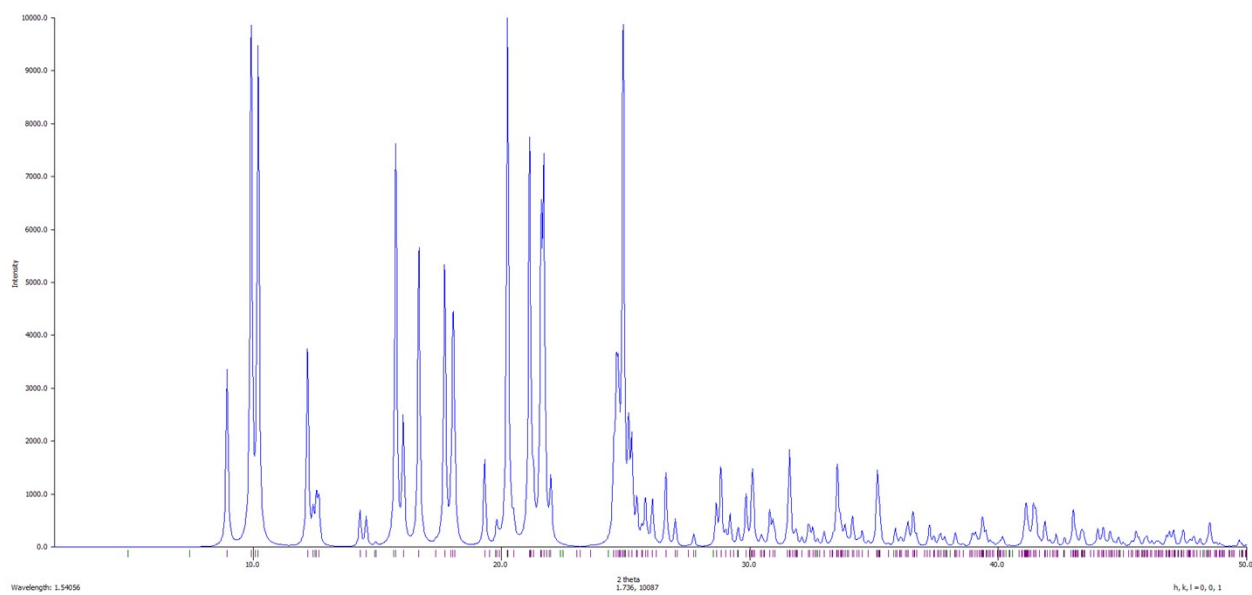

(b)

**Figure S5.** (a) Experimental PXRD pattern of TRS-OX (2:1). (b) Simulated PXRD pattern of TRS-OX (2:1) generated from the crystal structure (image generated in CCDC Mercury 4.3.1 (Build 273970))

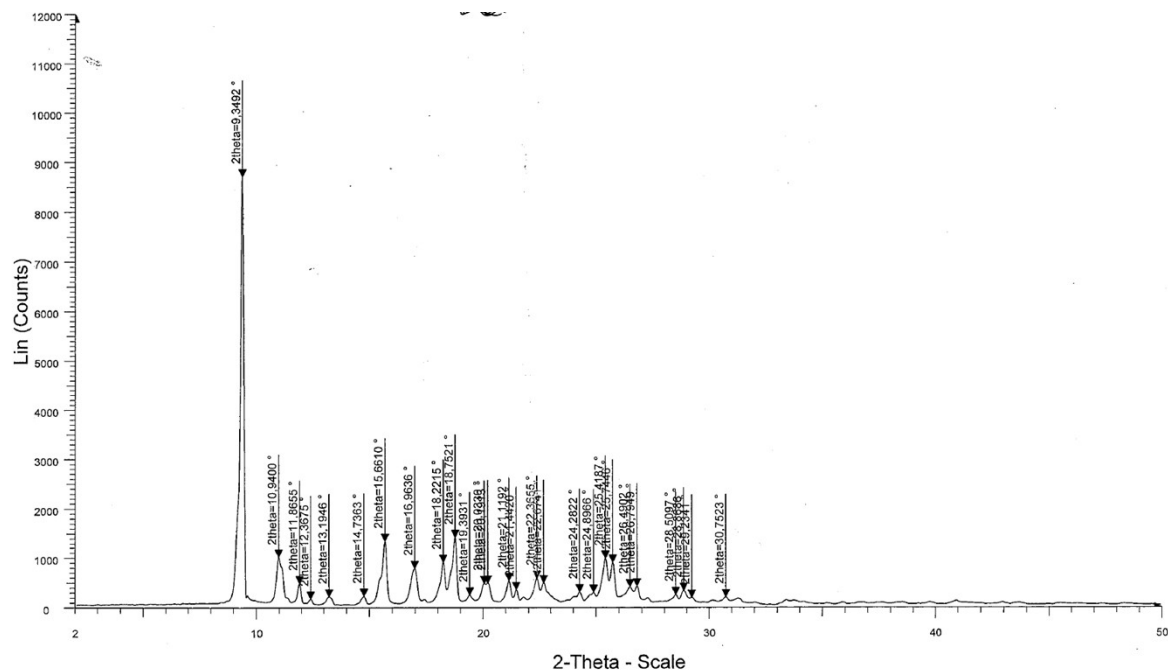

(a)

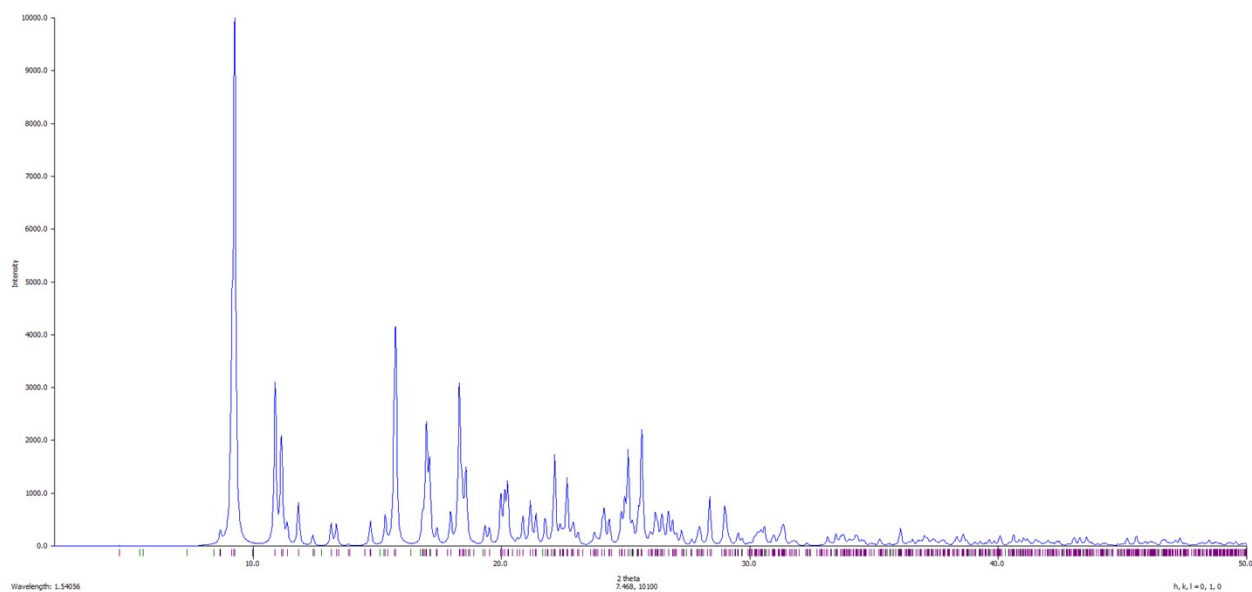

(b)

**Figure S6.** (a) Experimental PXRD pattern of TRS-OX-M (2:1:0.56). (b) Simulated PXRD pattern of TRS-OX-M (2:1:0.56) generated from the crystal structure (image generated in CCDC Mercury 4.3.1 (Build 273970))

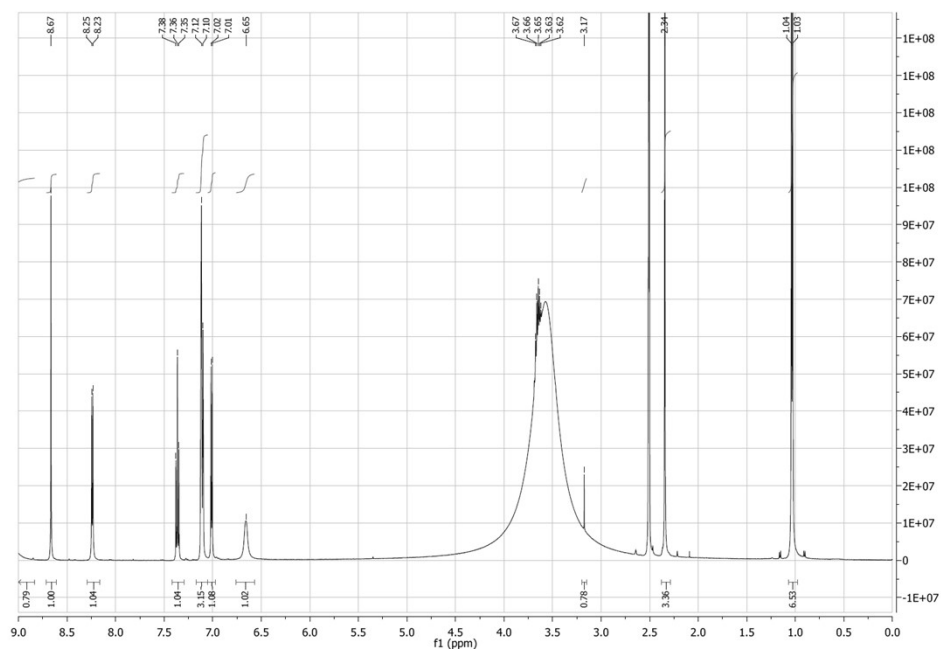

(a)

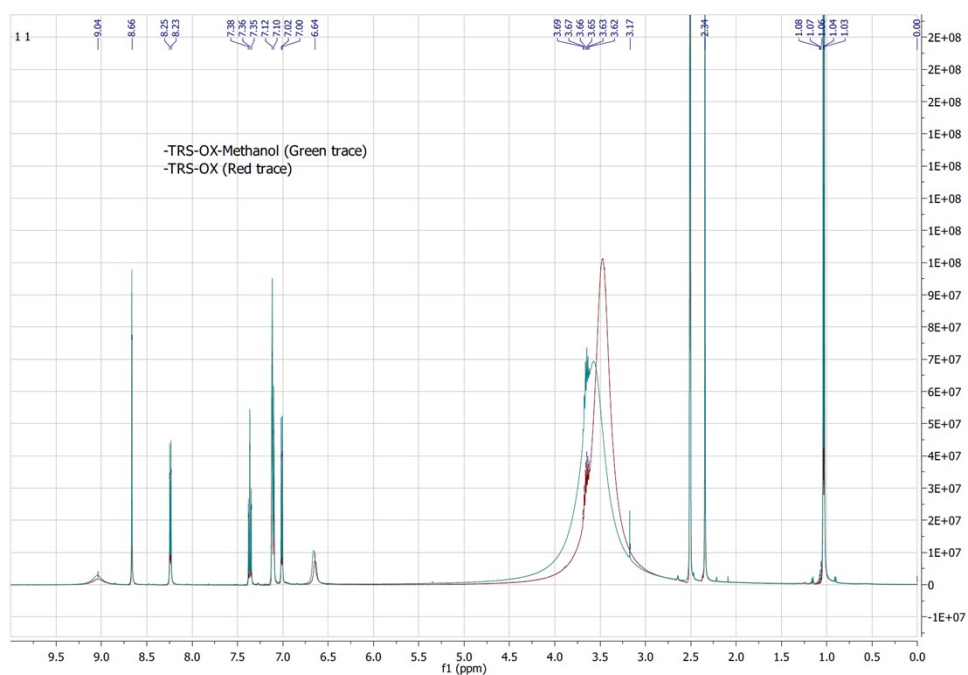

(b)

**Figure S7.** (a)  $^1\text{H}$ -NMR spectrum of TRS-OX-M material recorded in  $\text{DMSO-d}_6$  showing the partial site occupancy of methanol solvent. (b) Comparison of  $^1\text{H}$ -NMR spectrum of TRS-OX-M with the  $^1\text{H}$ -NMR anhydrous TRS-OX. The extra peak at 3.17ppm corresponds to  $\text{CH}_3$  of Methanol.

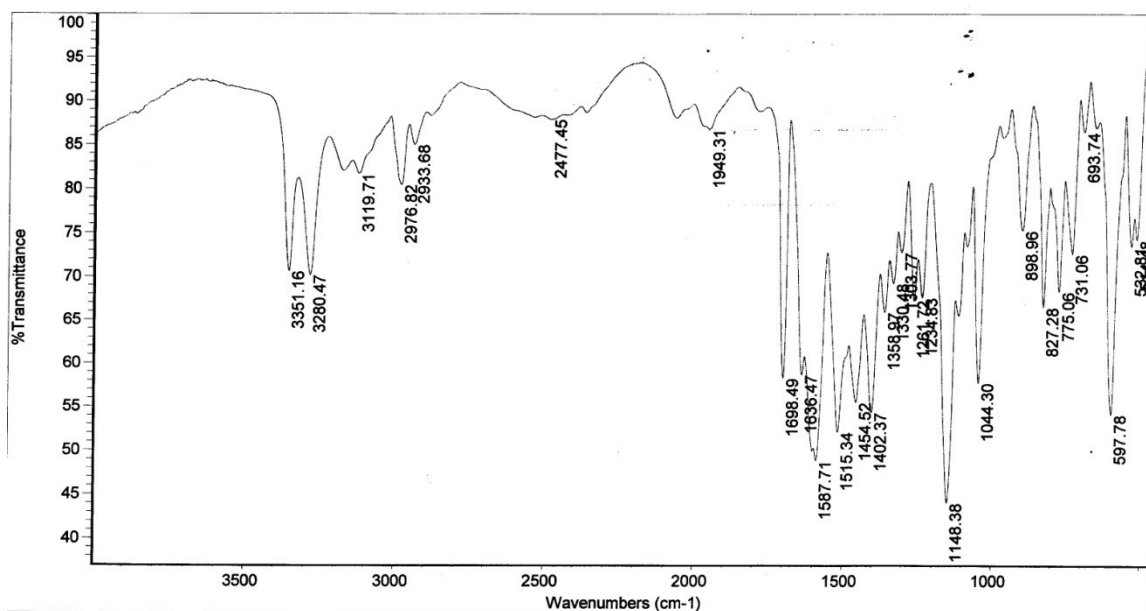

**Figure S8.** The FT-IR spectrum of polymorph T-I of torasemide.

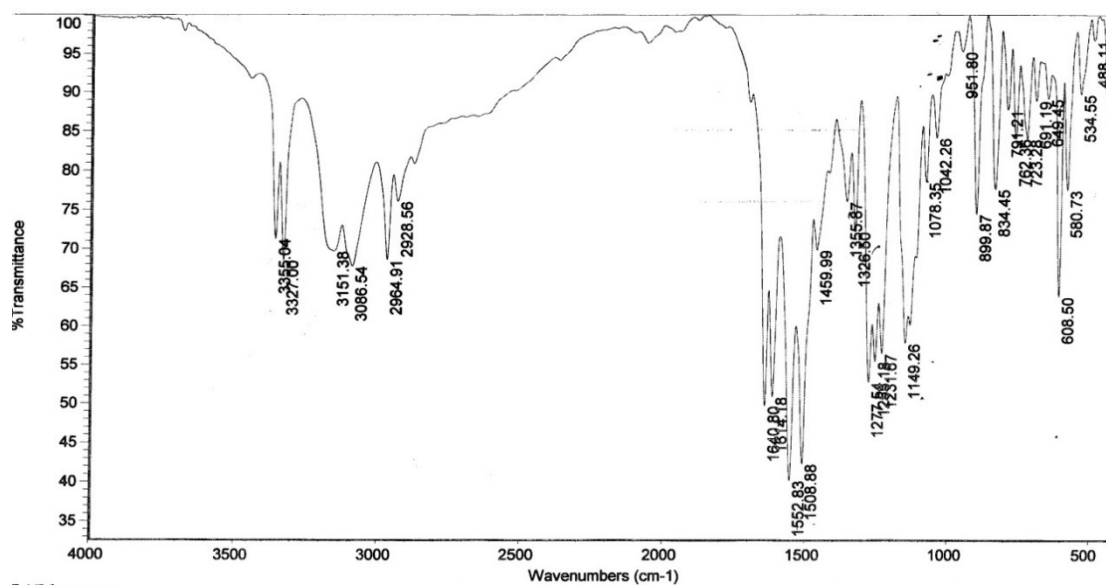

**Figure S9.** The FT-IR spectrum of polymorph T-III/T-N of torasemide.

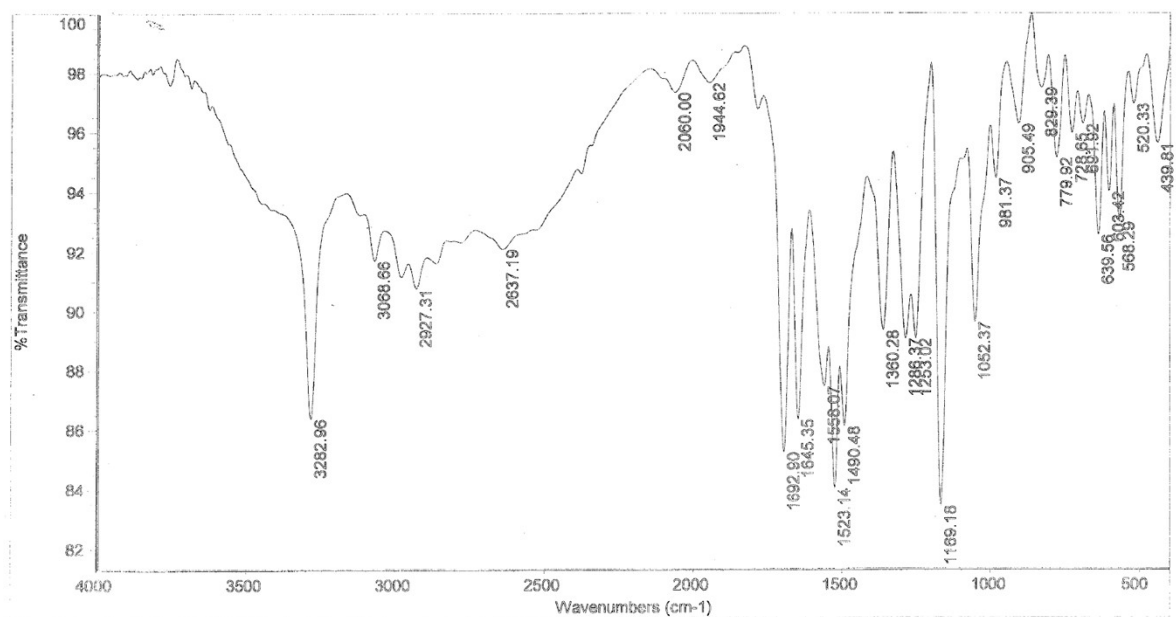

**Figure S10.** The FT-IR spectrum of torasemide fumarate (TRS-FUM) salt (1:1).

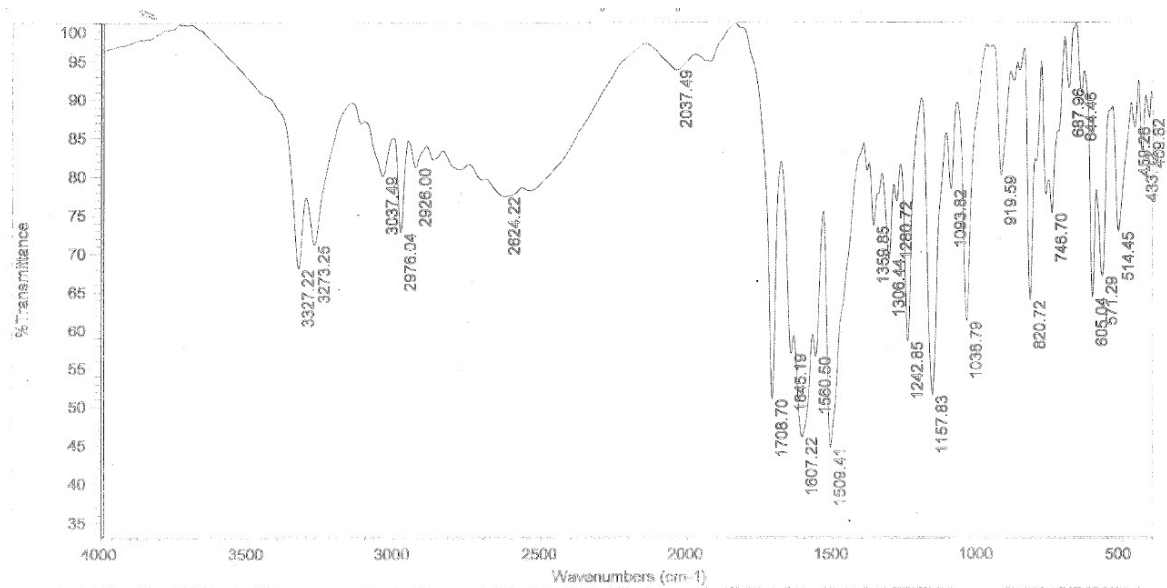

**Figure S11.** The FT-IR spectrum of torasemide oxalate (TRS-OX) salt (2:1).

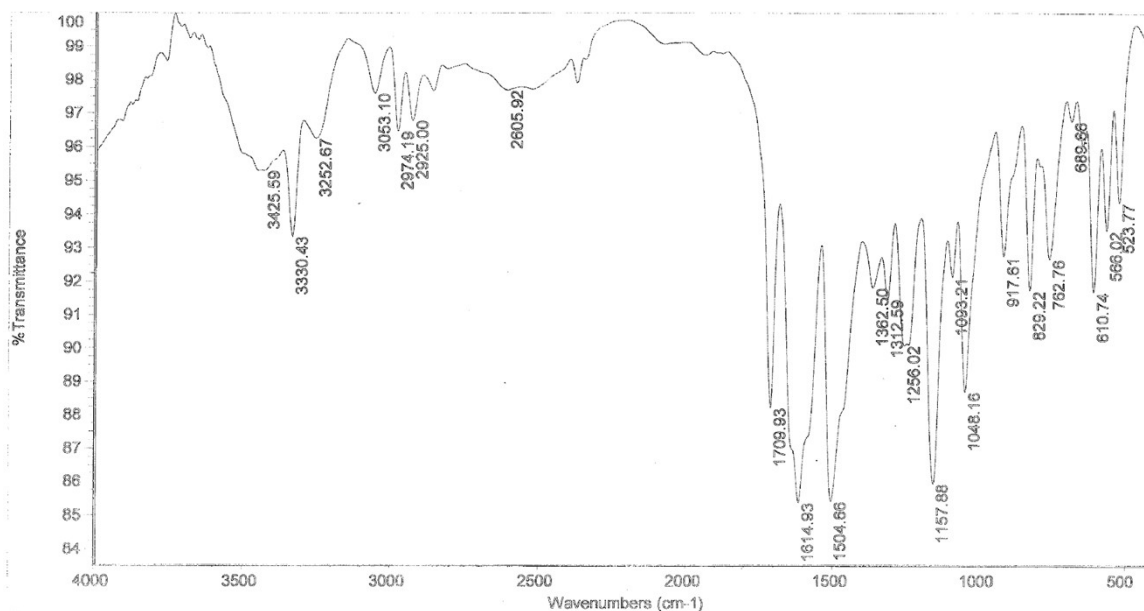

**Figure S12.** The FT-IR spectrum of torasemide oxalate methanolate salt (TRS-OX-M) (2:1:0.56).

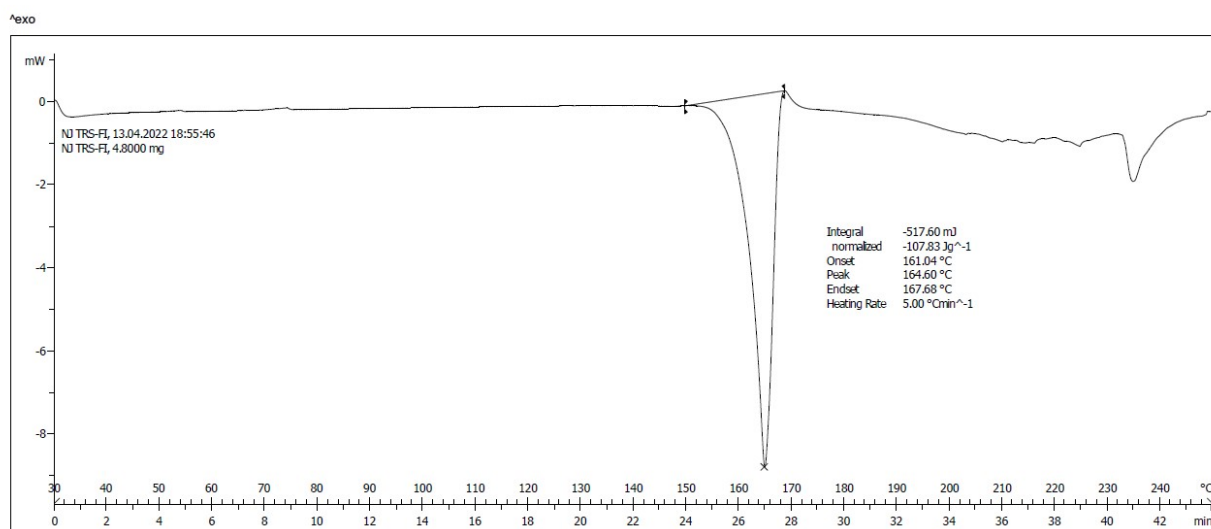

**Figure S13.** DSC thermogram of polymorph T-I of torasemide recorded at heating rate of 5°C/min from RT to 250°C. It shows a single melting endothermic event ( $T_{\text{onset}}$  at  $161.0 \pm 0.2^\circ\text{C}$ ,  $T_{\text{peak}}$  at  $164.6^\circ\text{C} \pm 0.2^\circ\text{C}$ ,  $T_{\text{endset}}$  at  $167.7 \pm 0.2^\circ\text{C}$ , Heat of fusion value of  $107.8 \pm 0.5 \text{ J/g}$ ).

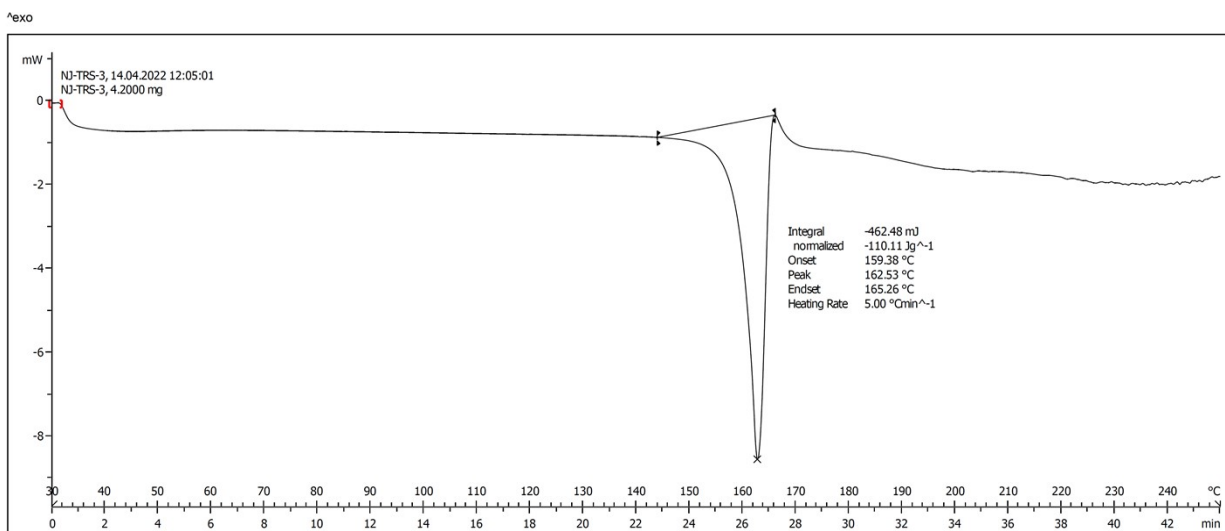

**Figure S14.** DSC thermogram of polymorph T-III/T-N of torasemide recorded at heating rate of 5°C/min from RT to 250°C. It shows a single melting endothermic event ( $T_{\text{onset}}$  at  $159.3 \pm 0.2^\circ\text{C}$ ,  $T_{\text{peak}}$  at  $162.5^\circ\text{C} \pm 0.2^\circ\text{C}$ ,  $T_{\text{endset}}$  at  $165.2 \pm 0.2^\circ\text{C}$ , Heat of fusion value of  $110.1 \pm 0.5 \text{ J/g}$ ).

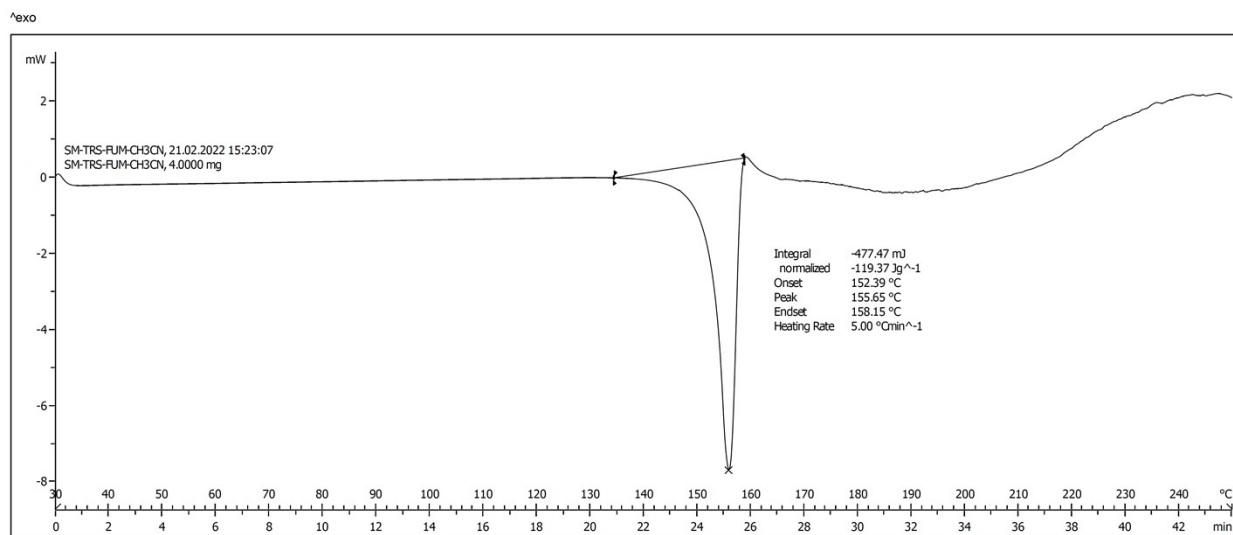

**Figure S15.** DSC thermogram of torasemide fumarate (TRS-FUM) salt (1:1) recorded at heating rate of 5°C/min from RT to 250°C. It shows a single melting endothermic event ( $T_{\text{onset}}$  at  $152.3 \pm 0.2^\circ\text{C}$ ,  $T_{\text{peak}}$  at  $155.6^\circ\text{C} \pm 0.2^\circ\text{C}$ ,  $T_{\text{endset}}$  at  $158.1 \pm 0.2^\circ\text{C}$ , Heat of fusion value of  $119.3 \pm 0.5 \text{ J/g}$ ).

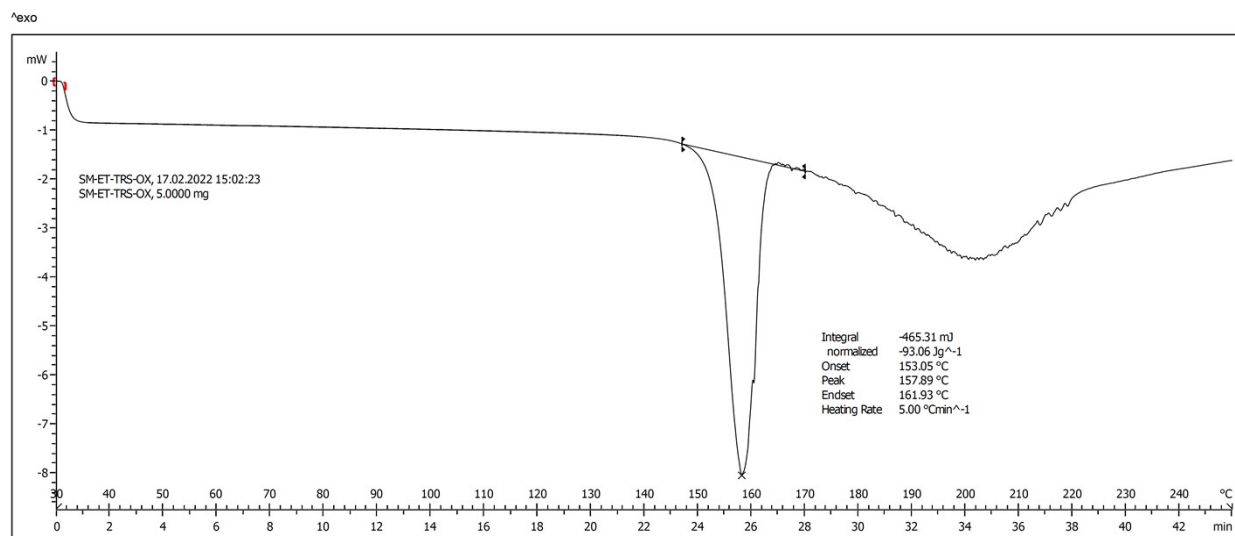

**Figure S16.** DSC thermogram of torasemide oxalate (TRS-OX) salt (2:1) recorded at heating rate of 5°C/min from RT to 250°C. It shows a single melting endothermic event ( $T_{\text{onset}}$  at  $153.0 \pm 0.2^\circ\text{C}$ ,  $T_{\text{peak}}$  at  $157.8^\circ\text{C} \pm 0.2^\circ\text{C}$ ,  $T_{\text{endset}}$  at  $161.9 \pm 0.2^\circ\text{C}$ , Heat of fusion value of  $93.0 \pm 0.5$  J/g).

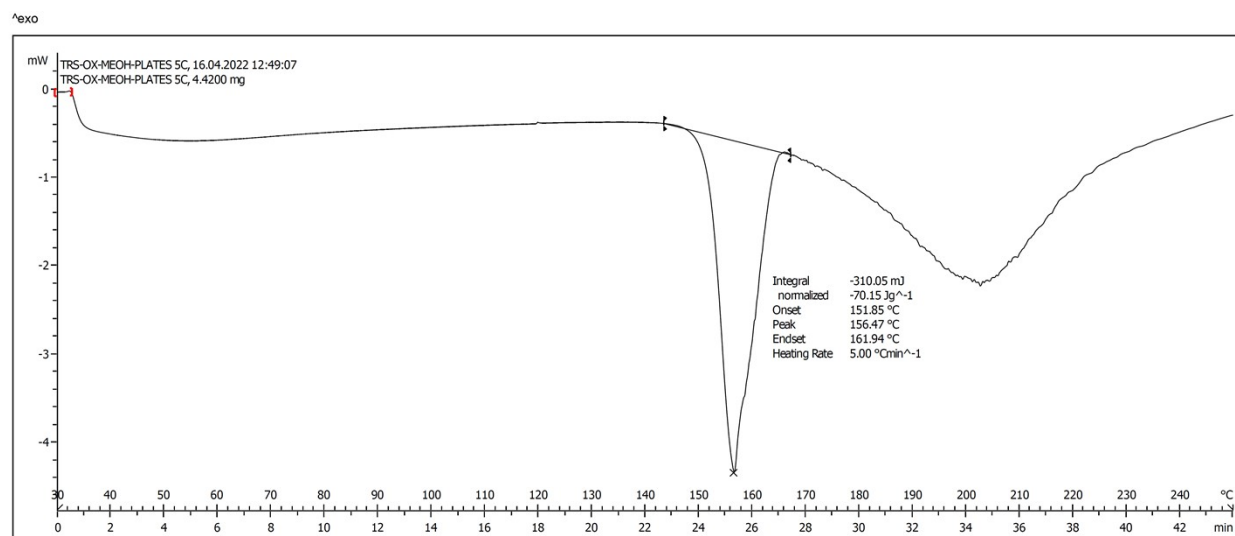

**Figure S17.** DSC thermogram of torasemide oxalate methanolate (TRS-OX-M) salt (2:1:0.56) recorded at heating rate of 5°C/min from RT to 250°C. It shows a single melting endothermic event ( $T_{\text{onset}}$  at  $151.8 \pm 0.2^\circ\text{C}$ ,  $T_{\text{peak}}$  at  $156.4^\circ\text{C} \pm 0.2^\circ\text{C}$ ,  $T_{\text{endset}}$  at  $161.9 \pm 0.2^\circ\text{C}$ , Heat of fusion value of  $70.1 \pm 0.5$  J/g).

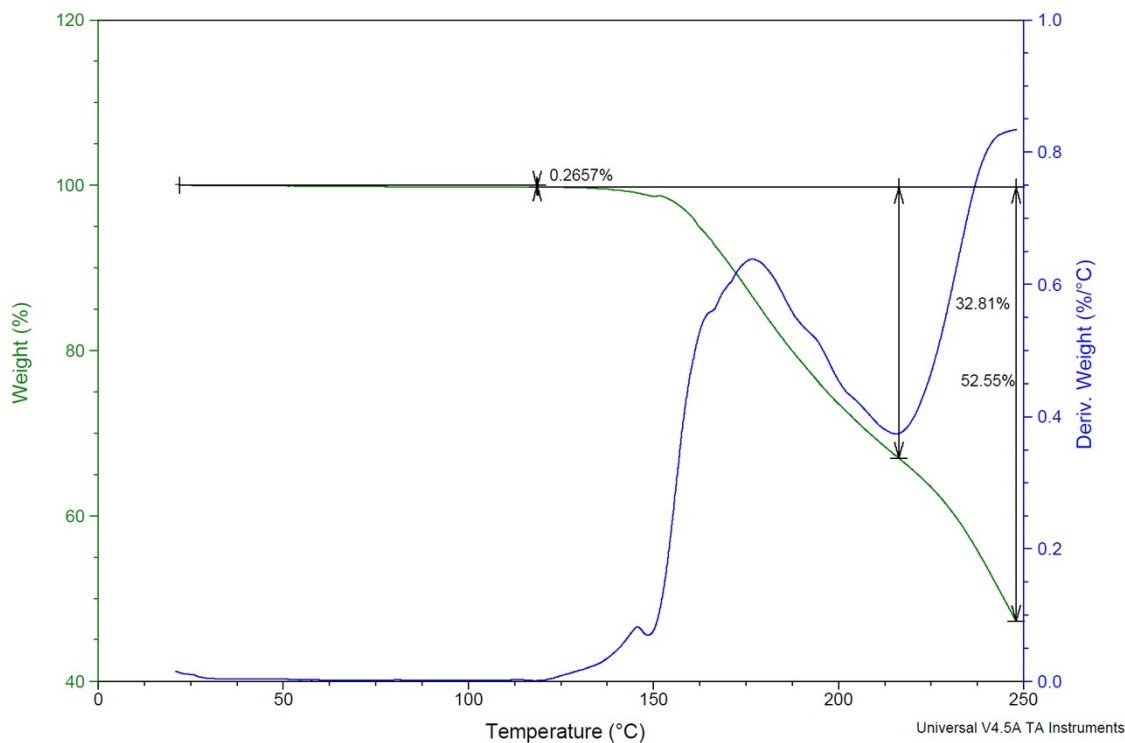

**Figure S18.** TGA plot of torasemide oxalate (TRS-FUM) salt (2:1) recorded at heating rate of 5°C/min from RT to 250°C. It shows a weight loss of 0.26% from RT to 100°C.

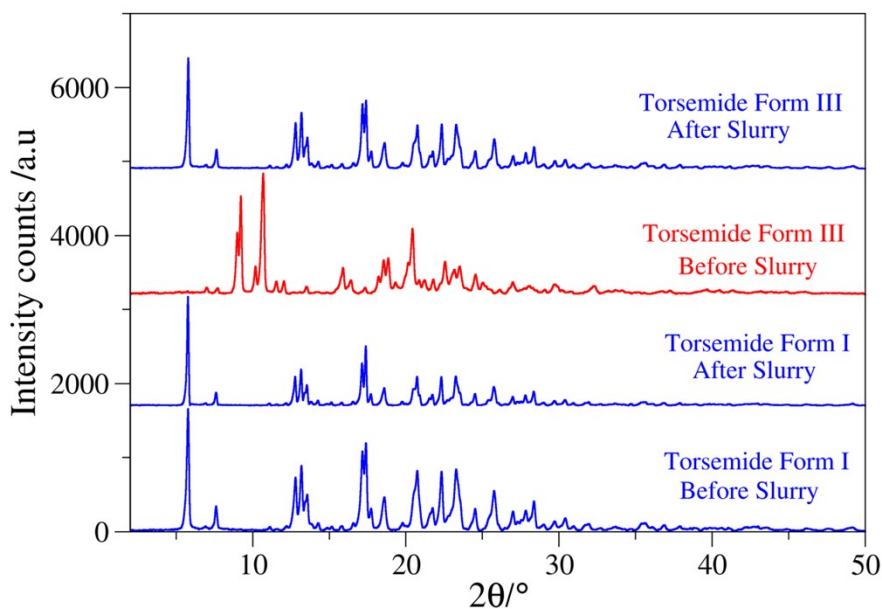

**Figure S19.** Slurry experiments of Torasemide in water. Torasemide form I remained stable after 24 hours of slurry, while Torasemide T-III/T-N converted to Torasemide form I, as indicated by changes in the powder X-ray diffraction pattern.

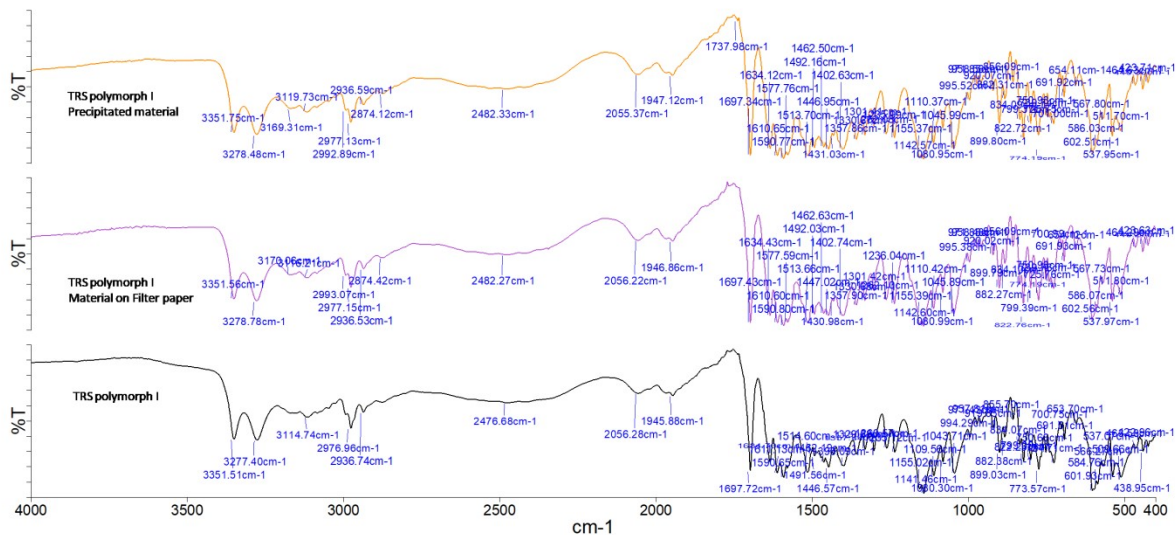

**Figure S20.** Slurry experiments of torasemide in water. Torasemide Form I remained stable after 24 hours of slurry.

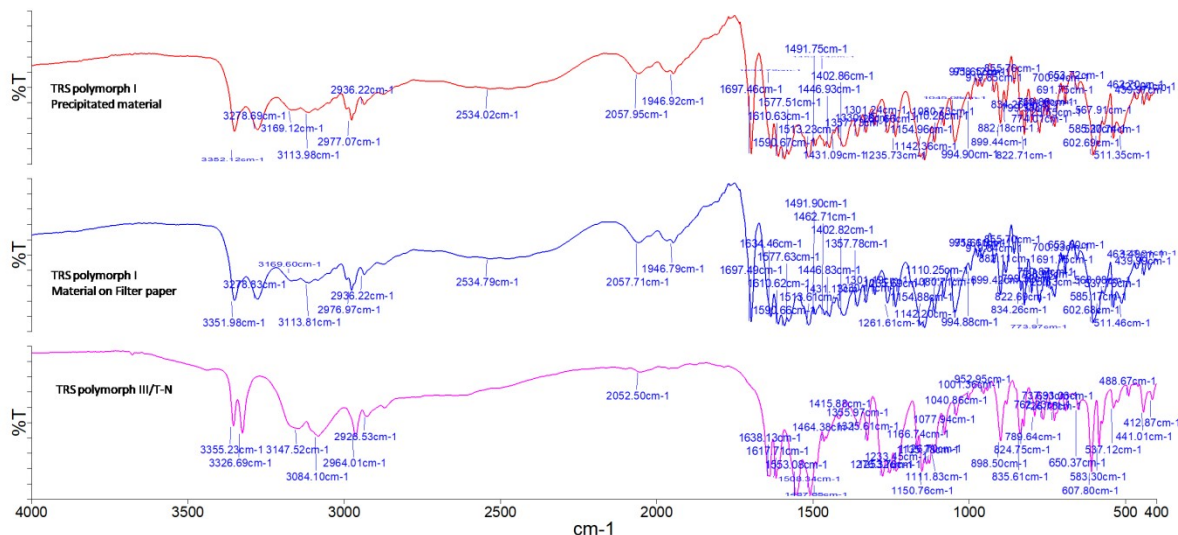

**Figure S21.** Slurry experiments of torasemide in water. Torasemide form III/T-N transformed to T-I after 24 hours of slurry.

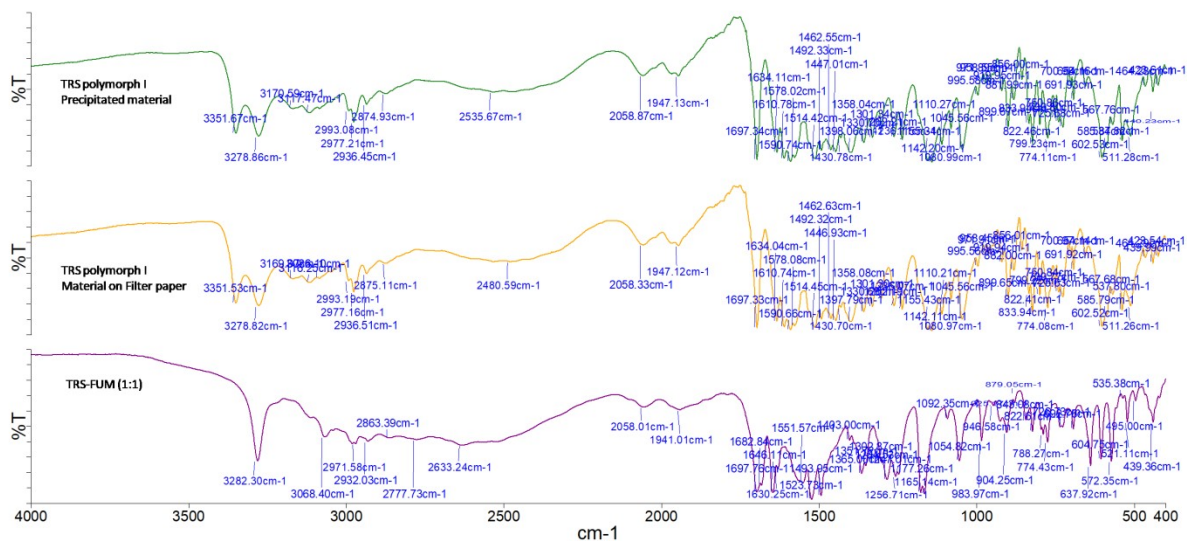

**Figure S22.** Slurry experiments of torasemide fumarate (1:1) salt in water which transformed to T-I polymorph of torasemide.

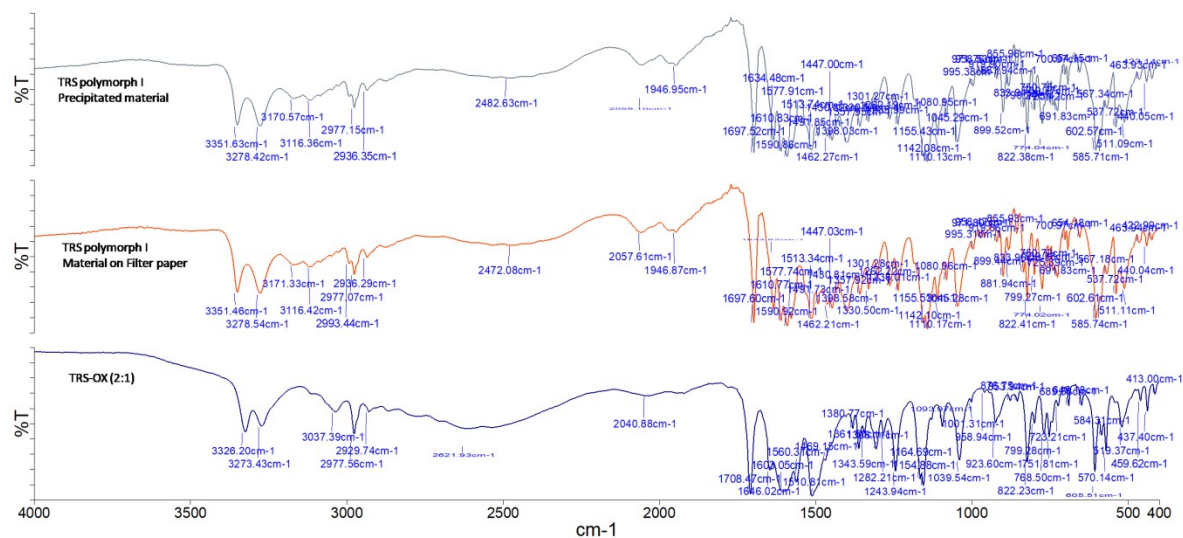

**Figure S23.** Slurry experiments of torasemide oxalate (2:1) salt in water which transformed to T-I polymorph of torasemide.
